# Supplementary material
Source: Springer Nature journal article supplement (https://www.springermedizin.de/resource/supplementary/13002_2009_170_MOESM2_ESM.pdf/9627322)

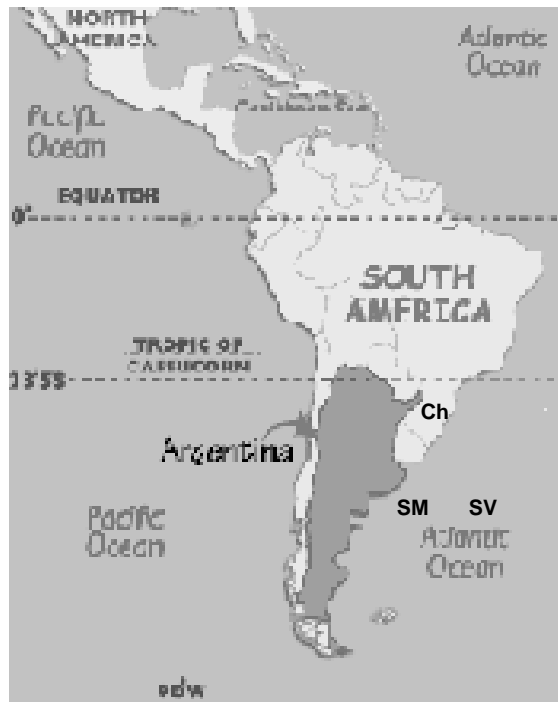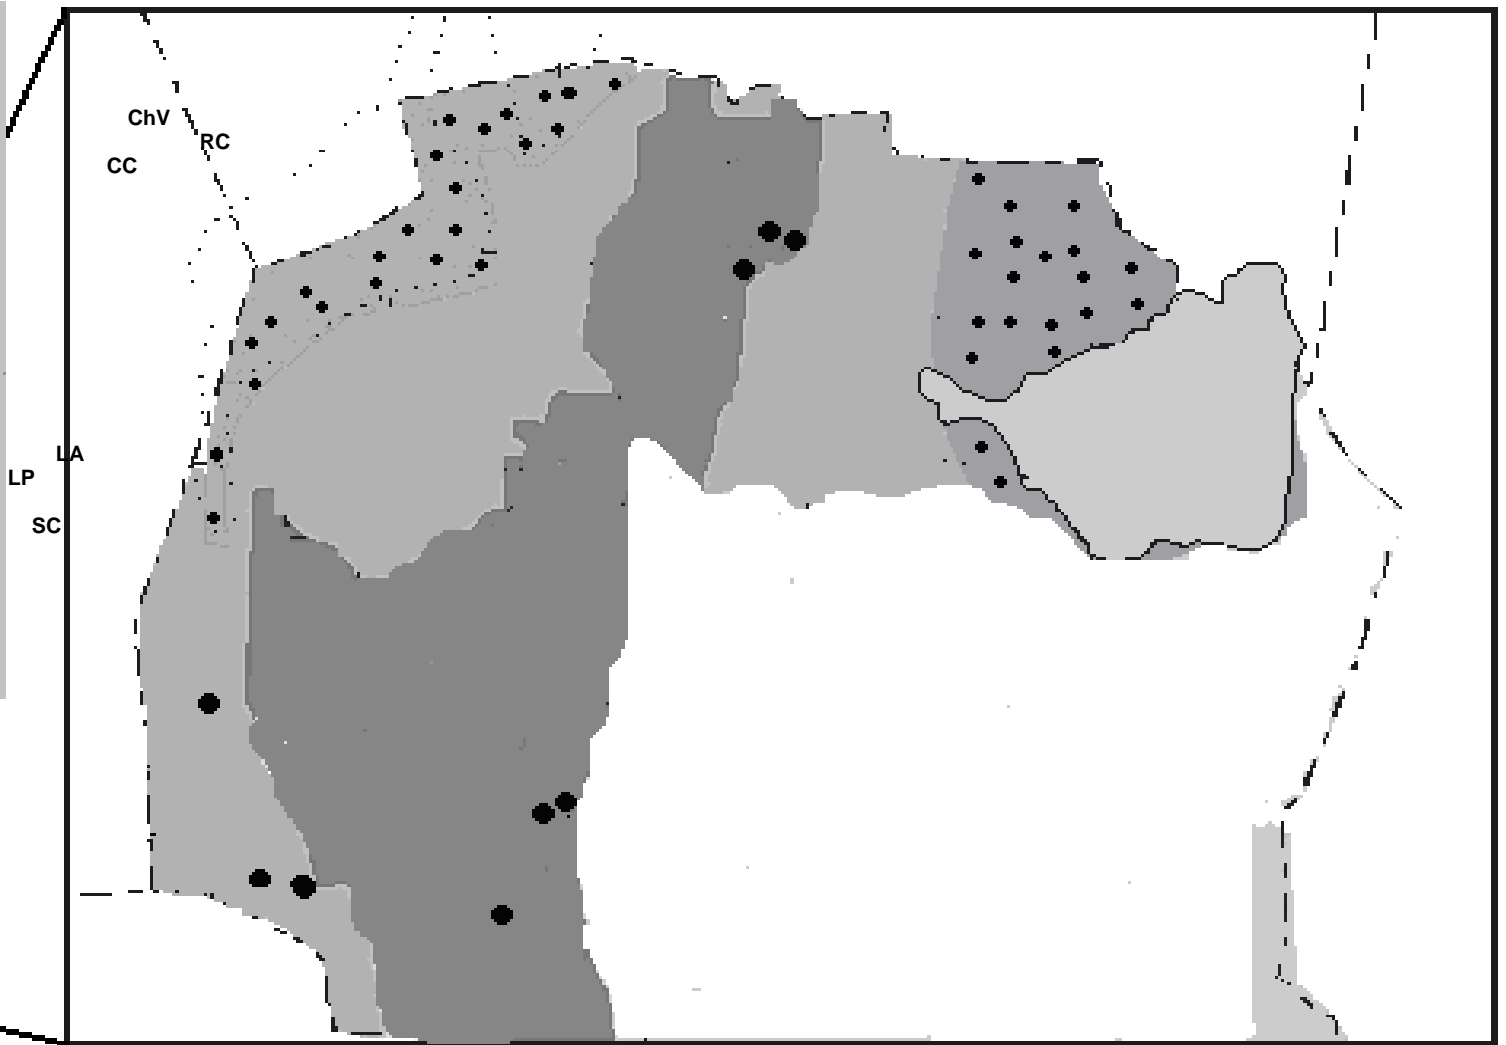

- |                                                                                       |                 |                                                                                       |                  |
|---------------------------------------------------------------------------------------|-----------------|---------------------------------------------------------------------------------------|------------------|
| 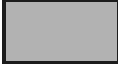 | Bosque chaqueño |  | Espinal          |
|  | Bosque serrano  |  | Depresión salina |

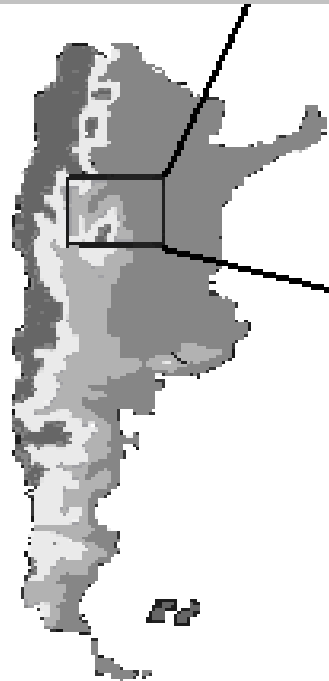

Supplement: MOESM2 [file 9627322]
